# Supplementary material for: Plasmonic enhancement of gold nanoparticles on photocycloreversion reaction of diarylethene derivatives depending on particle size, distance from the particle surface, and irradiation wavelength
Source: Royal Society of Chemistry journal article supplement (doi:10.1039/c2cp23820a), 2012-01-01
Supplement: c2cp23820a.pdf [file c2cp23820a.pdf]

## Supplementary Information

### **Plasmonic enhancement of gold nanoparticles on photocycloreversion reaction of diarylethene derivatives depending on particle size, distance from the particle surface, and irradiation wavelength**

Hiroyasu Nishi,<sup>a</sup> Tsuyoshi Asahi<sup>b</sup> and Seiya Kobatake\*<sup>a</sup>

<sup>a</sup>*Department of Applied Chemistry, Graduate School of Engineering, Osaka City  
University, 3-3-138 Sugimoto, Sumiyoshi-ku, Osaka 558-8585, Japan.*

<sup>b</sup>*Department of Material Science and Biotechnology, Ehime University, 10-13  
Dogohimata, Matsuyama, Ehime 790-8577, Japan.*

*E-mail: kobatake@a-chem.eng.osaka-cu.ac.jp*

**Table S1.** Polymerization conditions and characterization of poly(DE) homopolymers.<sup>a</sup>

| Monomer   | [Monomer]<br>/ mol dm <sup>-3</sup> | [PEDB]<br>/ mol dm <sup>-3</sup> | Conv<br>/ % | $M_n^b$ | $M_w/M_n^b$ | $n^c$ |
|-----------|-------------------------------------|----------------------------------|-------------|---------|-------------|-------|
| <b>1a</b> | 2.9                                 | 0.045                            | 63          | 14700   | 1.09        | 41    |
| <b>2a</b> | 2.9                                 | 0.045                            | 81          | 16600   | 1.06        | 53    |
| <b>3a</b> | 2.9                                 | 0.045                            | 82          | 18000   | 1.07        | 54    |
| <b>4a</b> | 2.9                                 | 0.045                            | 82          | 17800   | 1.09        | 54    |

<sup>a</sup>[ATMP] =  $1.0 \times 10^{-3}$  mol dm<sup>-3</sup>, in toluene for 60 h at 100 °C. <sup>b</sup>Determined by GPC. <sup>c</sup>Determined as the theoretical value ( $n = [\text{Monomer}]/[\text{PEDB}] \times \text{conv.}$ ).

**Table S2.** Polymerization conditions and characterization of the macro-RAFT agent and poly(**2a**)-*block*-poly(St).<sup>a</sup>

| Monomer   | [Monomer]<br>/ mol dm <sup>-3</sup> | RAFT<br>agent     | [RAFT]<br>/ mol dm <sup>-3</sup> | $M_n^b$ | $M_w/M_n^b$ | $n^c$ | $m^d$ |
|-----------|-------------------------------------|-------------------|----------------------------------|---------|-------------|-------|-------|
| <b>2a</b> | 2.9                                 | PEDB              | 0.075                            | 10900   | 1.07        | 25    | -     |
| St        | 3.0                                 | poly( <b>2a</b> ) | 0.12                             | 11800   | 1.07        | 25    | 9     |
| St        | 3.0                                 | poly( <b>2a</b> ) | 0.030                            | 17100   | 1.10        | 25    | 56    |

<sup>a</sup>[ATMP] =  $1.0 \times 10^{-3}$  mol dm<sup>-3</sup>, in toluene for 60 h at 100 °C. <sup>b</sup>Determined by GPC. <sup>c</sup>Determined as the theoretical value ( $n = [\text{Monomer}]/[\text{PEDB}] \times \text{conv.}$ ). <sup>d</sup>Determined by <sup>1</sup>H NMR spectroscopy.

**Table S3.** Molar absorption coefficient of the closed-ring form ( $\epsilon$ ) and photocycloreversion quantum yield ( $\Phi_{c \rightarrow o}$ ) of Au-free poly(DE) in toluene, and enhancement factor ( $E$ ) determined by one-component fitting for Au-poly(DE) in THF/water upon irradiation at various wavelengths.

| Sample               | Wavelength<br>/nm | Au-free poly(DE)                                                  |                          | Au-poly(DE)           |                    |
|----------------------|-------------------|-------------------------------------------------------------------|--------------------------|-----------------------|--------------------|
|                      |                   | $\epsilon$<br>/mol <sup>-1</sup> dm <sup>3</sup> cm <sup>-1</sup> | $\Phi_{c \rightarrow o}$ | One-component fitting |                    |
|                      |                   |                                                                   |                          | $E$                   | $R^2$ <sup>a</sup> |
| Au-poly( <b>1a</b> ) | 700               | 8900                                                              | 0.00025                  | 1.81                  | 0.995              |
| Au-poly( <b>1a</b> ) | 675               | 15300                                                             | 0.00026                  | 1.47                  | 0.999              |
| Au-poly( <b>1a</b> ) | 650               | 19900                                                             | 0.00028                  | 1.25                  | 0.999              |
| Au-poly( <b>1a</b> ) | 625               | 22300                                                             | 0.00032                  | 1.16                  | 0.995              |
| Au-poly( <b>1a</b> ) | 600               | 22300                                                             | 0.00033                  | 1.57                  | 0.997              |
| Au-poly( <b>2a</b> ) | 650               | 9500                                                              | 0.0042                   | 1.10                  | 0.999              |
| Au-poly( <b>2a</b> ) | 600               | 16100                                                             | 0.0048                   | 1.35                  | 0.995              |
| Au-poly( <b>2a</b> ) | 575               | 16000                                                             | 0.0052                   | 1.26                  | 0.990              |
| Au-poly( <b>2a</b> ) | 550               | 13000                                                             | 0.0060                   | 1.15                  | 0.999              |
| Au-poly( <b>3a</b> ) | 550               | 13300                                                             | 0.014                    | 0.98                  | 0.985              |
| Au-poly( <b>3a</b> ) | 525               | 13900                                                             | 0.015                    | 0.96                  | 0.993              |
| Au-poly( <b>3a</b> ) | 500               | 12000                                                             | 0.016                    | 1.04                  | 0.973              |
| Au-poly( <b>4a</b> ) | 500               | 8300                                                              | 0.086                    | 0.82                  | 0.987              |
| Au-poly( <b>4a</b> ) | 470               | 10300                                                             | 0.091                    | 0.92                  | 0.970              |
| Au-poly( <b>4a</b> ) | 450               | 9300                                                              | 0.10                     | 0.85                  | 0.997              |

<sup>a</sup> $R^2$  represents the correlation coefficient in the fitting.

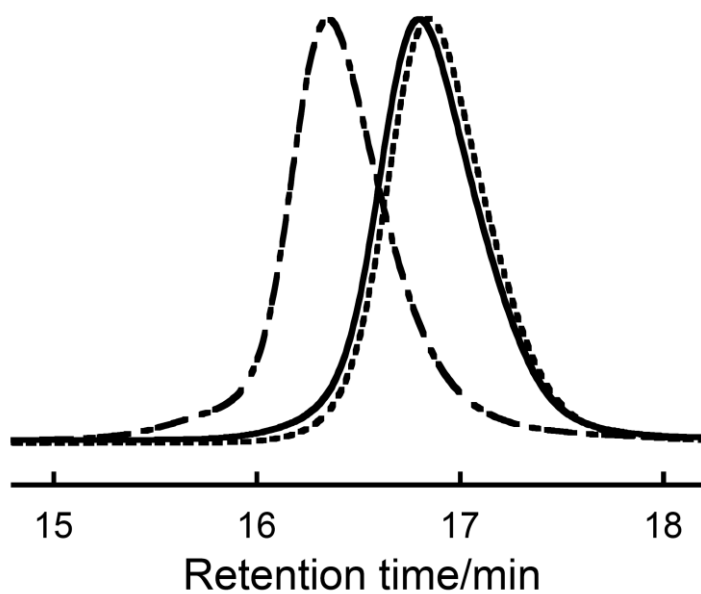

**Figure S1.** GPC elution curves of poly(**2a**) as the macro-RAFT agent (-----), poly(**2a**)<sub>25</sub>-block-poly(St)<sub>9</sub> (—), and poly(**2a**)<sub>25</sub>-block-poly(St)<sub>56</sub> (- — -).

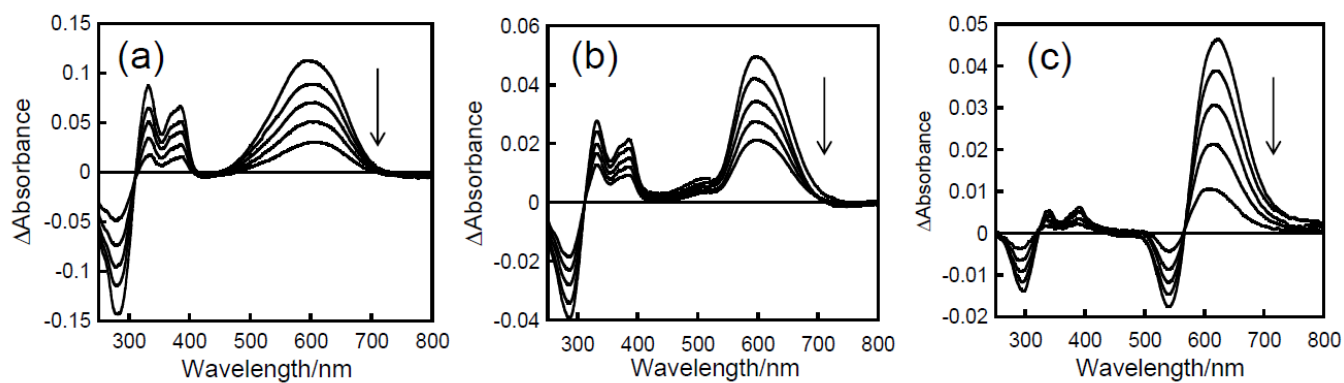

**Figure S2.** Difference spectral changes of (a) Au-poly(**2a**) ( $d = 4$  nm) in methanol, (b) Au-poly(**2a**) ( $d = 14$  nm) in THF/water (30/70 vol/vol), and (c) Au-poly(**2a**) ( $d = 41$  nm) in THF/water (30/70 vol/vol) upon irradiation at 600 nm.

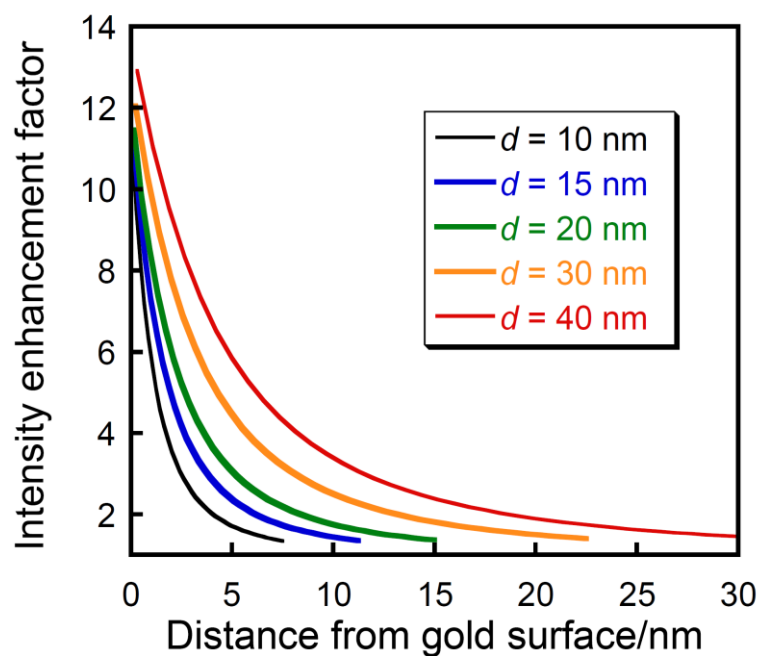

**Figure S3.** Intensity enhancement factor around various sized gold nanoparticle upon irradiation at 600 nm calculated based on Mie theory. Refractive index of the medium is set to be 1.400. The horizontal axis represents the distance from the nanoparticle surface. The vertical axis represents maximum intensity enhancement factor.
